# Supplementary material for: Reconfiguring the endogenous electric field of a wound through a conductive hydrogel for effective exudate management to enhance skin wound healing
Source: Royal Society of Chemistry journal article supplement (doi:10.1039/d4tb01349b), 2024-01-01
Supplement: d4tb01349b2.pdf [file d4tb01349b2.pdf]

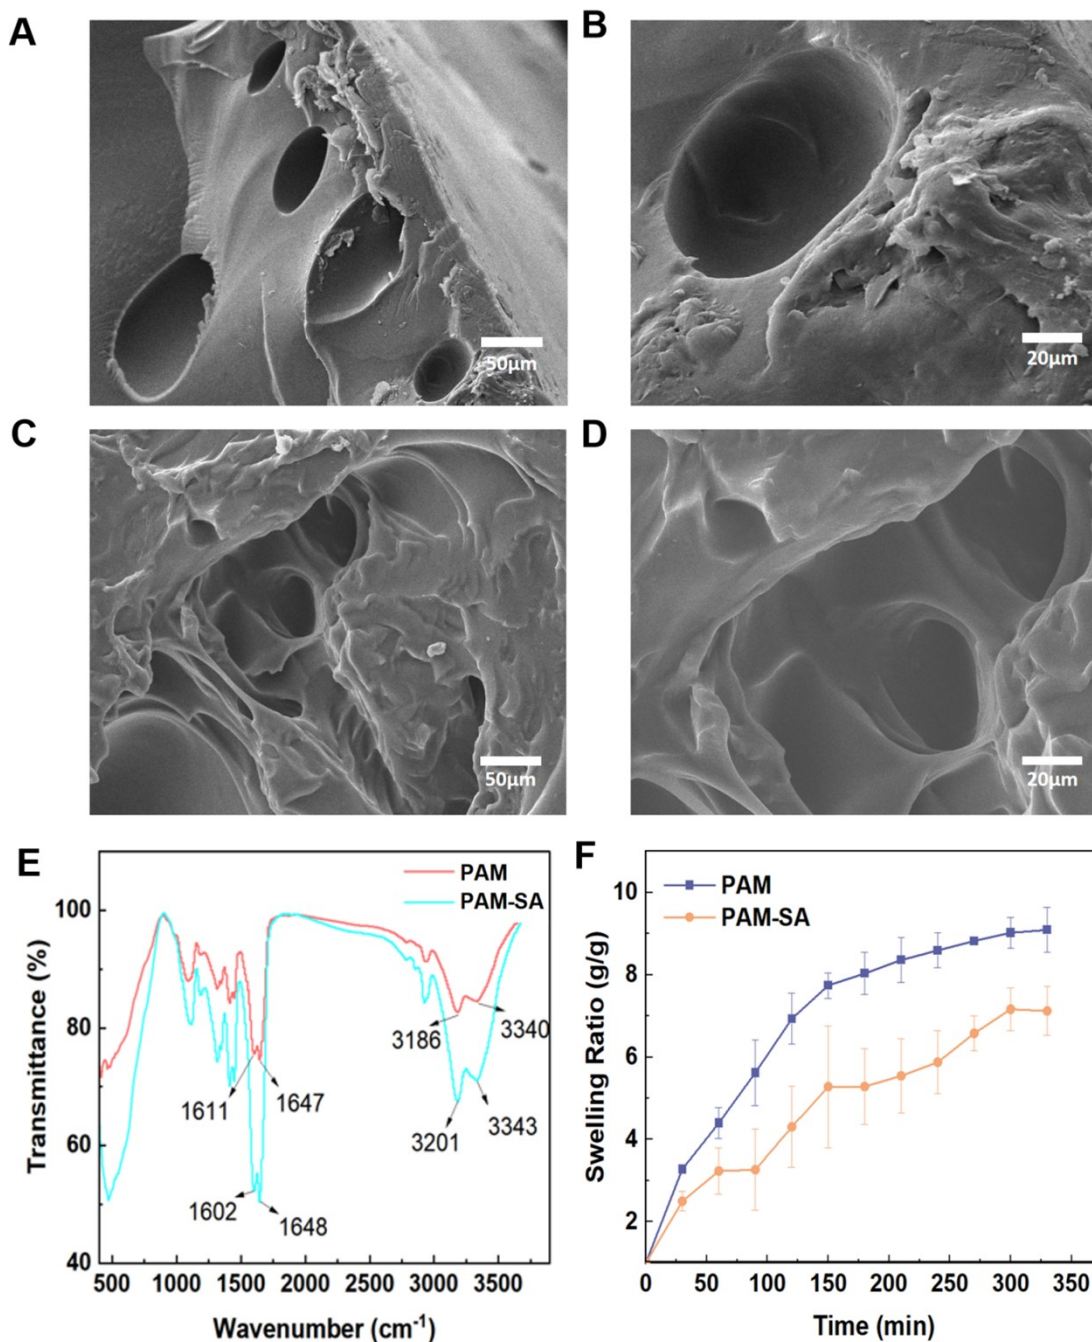

9

10 **Figure S1. Characterization of Hydrogels.** (A-D) SEM images of these hydrogels with different  
 11 magnifications. resulting in the formation of a lamellar double network structure. (E) FT-IR of  
 12 PAM-SA and PAM hydrogel. In PAM samples, the peak at 3343 and 3201  $\text{cm}^{-1}$  corresponded to  
 13 the stretching vibrations of the amino group  $-\text{NH}_2$ . The peak at 1648  $\text{cm}^{-1}$  was attributed to the  
 14 carbonyl  $\text{C}=\text{O}$  stretching band, while the peak at 1602  $\text{cm}^{-1}$  corresponded to the amino group  $-\text{NH}_2$ .  
 15 However, in PAM-SA samples, the stretching of  $-\text{NH}_2$  group was shifted to 1611 and 1674  $\text{cm}^{-1}$ ,  
 16 and N-H stretching peaks at 3343 and 3201  $\text{cm}^{-1}$  were shifted to 3340 and 3186  $\text{cm}^{-1}$ , respectively.  
 17 Additionally, the stretching of carbonyl  $\text{C}=\text{O}$  was shifted from 1648  $\text{cm}^{-1}$  (PAM) to 1647  $\text{cm}^{-1}$   
 18 (PAM-SA hydrogel). (F) Swelling properties of PAM-SA and PAM.

19

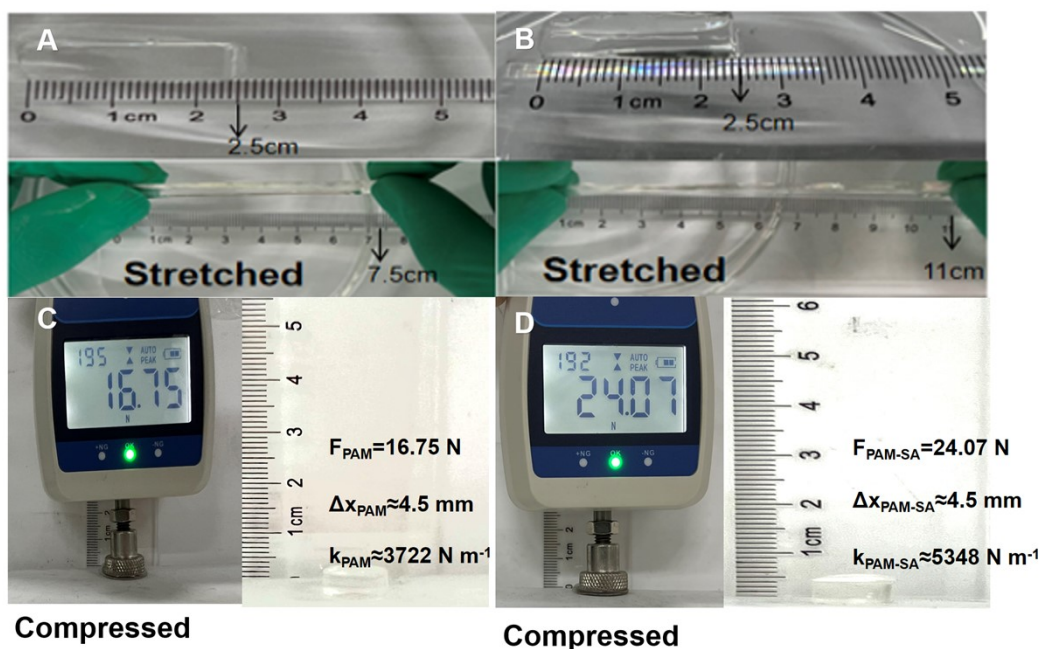

20

21 **Figure S2. Characterization of Toughness of Hydrogels.** (A) Tensile properties of PAM. (B)  
 22 Tensile properties of PAM-SA. (C) Compression performance of PAM. (D) Compression  
 23 performance of PAM-SA.

24

25 **Movie S1.** This movie shows the detailed process of electric field reconstruction for  
 26 the wound site
